# Supplementary material for: Mechanisms of prey division in striped marlin, a marine group hunting predator
Source: Springer Nature journal article supplement (doi:10.1038/s42003-022-03951-3), 2022-10-31
Supplement: MOESM2 [file 42003_2022_3951_MOESM2_ESM.pdf]

## **Description of Additional Supplementary Files**

**File name:** Supplementary Video 1

**Description:** Striped marlin dash sequence.

**File name:** Supplementary Video 2

**Description:** Striped marlin dash sequence with prey captures.
